# Supplementary material for: Adhesion mechanism in a DOPA-deficient foot protein from green mussels
Source: Royal Society of Chemistry journal article supplement (doi:10.1039/c2sm25173f), 2012-01-01
Supplement: c2sm25173f.pdf [file c2sm25173f.pdf]

## Supplementary Information

### ADHESION MECHANISM IN A DOPA-DEFICIENT FOOT PROTEIN FROM GREEN MUSSELS

Dong Soo Hwang<sup>1,4,§,\*</sup>, Hongbo Zeng<sup>2,§,\*</sup>, Qingye Lu<sup>2</sup>,  
Jacob Israelachvili<sup>3,4,\*</sup>, and J. Herbert Waite<sup>4,5,\*</sup>

<sup>1</sup>Ocean Science and Technology Institute, Pohang University of Science and Technology, Hyoja-Dong, Nam-Gu, Pohang, Gyeongbuk, 790-784, Korea

<sup>2</sup>Department of Chemical and Materials Engineering, University of Alberta, Edmonton, AB, T6G 2V4 Canada

<sup>3</sup>Department of Chemical Engineering, <sup>4</sup>Materials Research Laboratory, and <sup>5</sup>Department of Molecular, Cell and Developmental Biology, University of California, Santa Barbara, CA 93106, USA

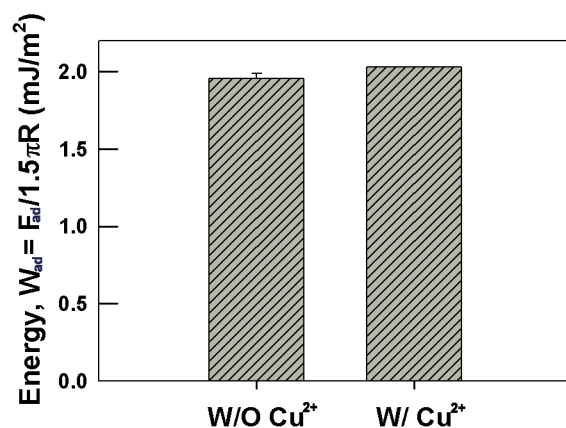

**Figure s1.** Adhesion energy per unit area,  $W_{ad}$ , changes between two pvfp-1 coated surfaces in 0.1 M sodium acetate, 0.25 M KNO<sub>3</sub>, pH 5.5 due to addition of 10  $\mu$ M CuCl<sub>2</sub>. Each value and error bar represents the mean of duplicated (n=2) samples and its standard deviation.

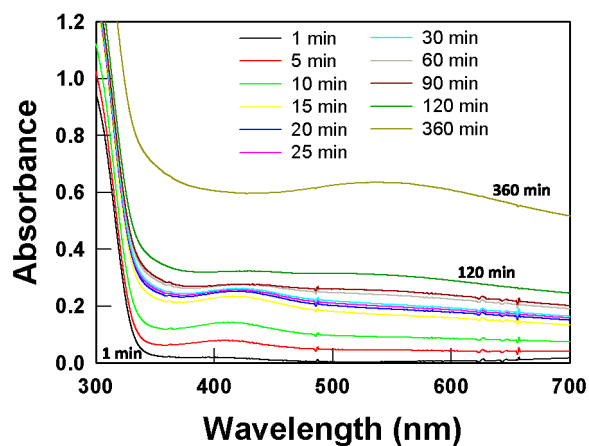

**Figure s2.** UV-Vis spectrum of 7-hydroxyindole with 10  $\mu\text{M}$   $\text{CuCl}_2$  in 0.1 M sodium acetate, 0.25 M  $\text{KNO}_3$ , pH 5.5. Addition of  $\text{FeCl}_3$  also showed trends similar to  $\text{CuCl}_2$ .

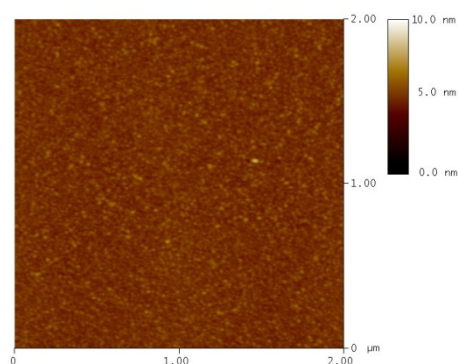

**Figure s3.** AFM image (tapping mode) of pvfp-1 film deposited on freshly cleaved mica.

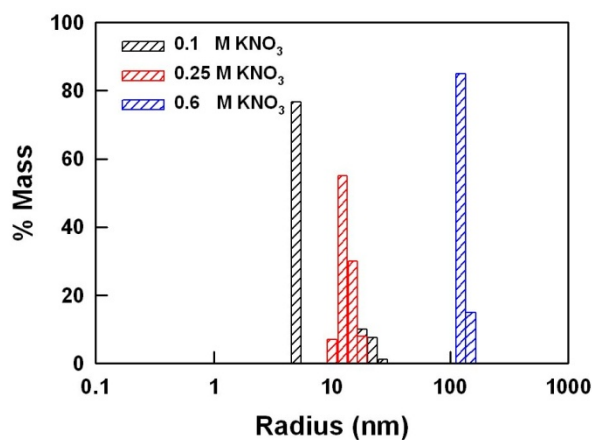

**Figure s4.** Hydrodynamic radius distribution of pvfp-1 in 0.1 M acetic acid (pH 3.0) depending on salt concentration by Dynamic Light Scattering (DLS)
